# Supplementary material
Source: publisher site journal article supplement (https://www.dovepress.com/article/263969)
Supplement: Supplementary file 1 [file get_supplementary_file.php]

Table S1: Barriers and Facilitators to practicing in accordance with the TSANZ Guideline

| Questions (Domain)                                                                                                                                        | Strongly Disagree/Disagree (%) | Neither agree nor disagree (%) | Strongly agree/agree (%) | Number of responses to question | Strongly Disagree/Disagree (%) | Neither agree nor disagree (%) | Strongly agree/agree (%) | Number of responses to question | Strongly Disagree/Disagree (%) | Neither agree nor disagree (%) | Strongly agree/agree (%) | Number of responses to question | Strongly Disagree/Disagree (%) | Neither agree nor disagree (%) | Strongly agree/agree (%) | Number of responses to question | Strongly Disagree/Disagree (%) | Neither agree nor disagree (%) | Strongly agree/agree (%) | Number of responses to question |
|-----------------------------------------------------------------------------------------------------------------------------------------------------------|--------------------------------|--------------------------------|--------------------------|---------------------------------|--------------------------------|--------------------------------|--------------------------|---------------------------------|--------------------------------|--------------------------------|--------------------------|---------------------------------|--------------------------------|--------------------------------|--------------------------|---------------------------------|--------------------------------|--------------------------------|--------------------------|---------------------------------|
| <b>BARRIERS</b>                                                                                                                                           | <b>ALL CLINICIANS</b>          |                                |                          |                                 | <b>PARAMEDIC</b>               |                                |                          |                                 | <b>NURSE</b>                   |                                |                          |                                 | <b>DOCTOR</b>                  |                                |                          |                                 | <b>PHYSIOTHERAPIST</b>         |                                |                          |                                 |
| It is difficult to provide EBC when the equipment needed is not available (Context)                                                                       | 12                             | 11                             | 77                       | 102                             | 0                              | 14                             | 86                       | 7                               | 12                             | 12                             | 77                       | 52                              | 12                             | 12                             | 76                       | 33                              | 20                             | 0                              | 80                       | 10                              |
| It is difficult to provide EBC to patients because it is difficult to get doctors to consistently and accurately prescribe oxygen therapy (Care Provider) | 10                             | 16                             | 74                       | 100                             | 14                             | 29                             | 57                       | 7                               | 6                              | 13                             | 81                       | 52                              | 6                              | 16                             | 77                       | 31                              | 40                             | 20                             | 40                       | 10                              |
| It is difficult to provide EBC to patients because oxygen is not considered or treated with the same care as other drugs (Care Provider)                  | 20                             | 16                             | 64                       | 100                             | 43                             | 14                             | 43                       | 7                               | 17                             | 10                             | 73                       | 52                              | 10                             | 23                             | 68                       | 31                              | 50                             | 30                             | 20                       | 10                              |
| If there are not enough supportive staff, it is difficult to provide EBC (Care provider)                                                                  | 29                             | 16                             | 55                       | 100                             | 29                             | 14                             | 57                       | 7                               | 27                             | 15                             | 58                       | 52                              | 26                             | 19                             | 55                       | 31                              | 50                             | 10                             | 40                       | 10                              |
| It is difficult to provide EBC to patients because nurses do not administer or monitor oxygen with enough care (Care Provider)                            | 28                             | 17                             | 55                       | 100                             | 43                             | 29                             | 29                       | 7                               | 27                             | 15                             | 58                       | 52                              | 13                             | 16                             | 71                       | 31                              | 70                             | 20                             | 10                       | 10                              |
| I did not read or remember the guideline (Care provider)                                                                                                  | 41                             | 13                             | 46                       | 105                             | 0                              | 14                             | 86                       | 7                               | 45                             | 20                             | 35                       | 55                              | 42                             | 6                              | 52                       | 33                              | 40                             | 10                             | 50                       | 10                              |
| I wish to know more about the TSANZ guideline before I decide to apply it (Care Provider)                                                                 | 31                             | 24                             | 45                       | 106                             | 14                             | 14                             | 71                       | 7                               | 24                             | 27                             | 49                       | 55                              | 41                             | 24                             | 35                       | 34                              | 50                             | 10                             | 40                       | 10                              |
| It is difficult to provide EBC to patients who do not know what their diagnosis is (Patient)                                                              | 40                             | 15                             | 44                       | 99                              | 14                             | 14                             | 71                       | 7                               | 37                             | 16                             | 47                       | 51                              | 52                             | 16                             | 32                       | 31                              | 40                             | 10                             | 50                       | 10                              |

(Continued)

Table S1: Barriers and Facilitators to practicing in accordance with the TSANZ Guideline

| Questions (Domain)                                                                                                                          | Strongly Disagree/Disagree (%) | Neither agree nor disagree (%) | Strongly agree/agree (%) | Number of responses to question | Strongly Disagree/Disagree (%) | Neither agree nor disagree (%) | Strongly agree/agree (%) | Number of responses to question | Strongly Disagree/Disagree (%) | Neither agree nor disagree (%) | Strongly agree/agree (%) | Number of responses to question | Strongly Disagree/Disagree (%) | Neither agree nor disagree (%) | Strongly agree/agree (%) | Number of responses to question | Strongly Disagree/Disagree (%) | Neither agree nor disagree (%) | Strongly agree/agree (%) | Number of responses to question |
|---------------------------------------------------------------------------------------------------------------------------------------------|--------------------------------|--------------------------------|--------------------------|---------------------------------|--------------------------------|--------------------------------|--------------------------|---------------------------------|--------------------------------|--------------------------------|--------------------------|---------------------------------|--------------------------------|--------------------------------|--------------------------|---------------------------------|--------------------------------|--------------------------------|--------------------------|---------------------------------|
| FACILITATORS                                                                                                                                | ALL CLINICIANS                 |                                |                          |                                 | PARAMEDIC                      |                                |                          |                                 | NURSE                          |                                |                          |                                 | DOCTOR                         |                                |                          |                                 | PHYSIOTHERAPIST                |                                |                          |                                 |
| I have a general resistance to working according to protocols (Care Provider)                                                               | 84                             | 9                              | 7                        | 102                             | 71                             | 14                             | 14                       | 7                               | 91                             | 6                              | 4                        | 53                              | 75                             | 13                             | 13                       | 32                              | 90                             | 10                             | 0                        | 10                              |
| I have difficulty in changing my old routines (Care Provider)                                                                               | 81                             | 11                             | 8                        | 105                             | 57                             | 29                             | 14                       | 7                               | 94                             | 6                              | 0                        | 54                              | 65                             | 15                             | 21                       | 34                              | 80                             | 20                             | 0                        | 10                              |
| It is difficult to provide EBC to patients because an SpO <sub>2</sub> level of 92% is too low for most patients (Care Provider)            | 77                             | 13                             | 10                       | 99                              | 43                             | 29                             | 29                       | 7                               | 71                             | 18                             | 12                       | 51                              | 87                             | 6                              | 6                        | 31                              | 100                            | 0                              | 0                        | 10                              |
| It is difficult to provide EBC to patients because this differs with basic concepts taught during my training (Care Provider)               | 76                             | 20                             | 4                        | 98                              | 71                             | 14                             | 14                       | 7                               | 70                             | 26                             | 4                        | 50                              | 84                             | 13                             | 3                        | 31                              | 80                             | 20                             | 0                        | 10                              |
| It is difficult to provide EBC because I am not sufficiently trained (Care Provider)                                                        | 72                             | 13                             | 15                       | 100                             | 43                             | 29                             | 29                       | 7                               | 75                             | 16                             | 10                       | 51                              | 75                             | 9                              | 16                       | 32                              | 70                             | 0                              | 30                       | 10                              |
| The TSANZ guideline is not a good starting point for my self-study <sup>a</sup> (Innovation)                                                | 71                             | 27                             | 2                        | 106                             | 57                             | 43                             | 0                        | 7                               | 78                             | 20                             | 2                        | 55                              | 65                             | 32                             | 3                        | 34                              | 60                             | 40                             | 0                        | 10                              |
| It is difficult to provide EBC because I have not been involved in setting up the practice change (Care Provider)                           | 69                             | 19                             | 12                       | 101                             | 71                             | 29                             | 0                        | 7                               | 77                             | 10                             | 13                       | 52                              | 50                             | 38                             | 13                       | 32                              | 90                             | 0                              | 10                       | 10                              |
| The TSANZ guideline does not fit into my ways of working in practice (Innovation)                                                           | 59                             | 40                             | 1                        | 101                             | 43                             | 57                             | 0                        | 7                               | 58                             | 40                             | 2                        | 52                              | 63                             | 38                             | 0                        | 32                              | 70                             | 30                             | 0                        | 10                              |
| It is difficult to provide EBC to patients who are acutely SOB who appear to need more oxygen than the guideline recommends (Care Provider) | 56                             | 22                             | 22                       | 100                             | 14                             | 29                             | 57                       | 7                               | 60                             | 17                             | 23                       | 52                              | 58                             | 23                             | 19                       | 31                              | 60                             | 40                             | 0                        | 10                              |
| Working with the TSANZ guideline is too time consuming (Innovation)                                                                         | 51                             | 46                             | 3                        | 101                             | 29                             | 57                             | 14                       | 7                               | 54                             | 46                             | 0                        | 52                              | 44                             | 50                             | 6                        | 32                              | 80                             | 20                             | 0                        | 10                              |
| I think parts of the guideline are incorrect (Care Provider)                                                                                | 50                             | 49                             | 1                        | 102                             | 0                              | 100                            | 0                        | 7                               | 51                             | 47                             | 2                        | 53                              | 56                             | 44                             | 0                        | 32                              | 60                             | 40                             | 0                        | 10                              |
| It is difficult to provide EBC to patients who have not had an Arterial Blood Gas taken (Context)                                           | 44                             | 13                             | 43                       | 100                             | 29                             | 29                             | 43                       | 7                               | 40                             | 13                             | 46                       | 52                              | 55                             | 6                              | 39                       | 31                              | 40                             | 20                             | 40                       | 10                              |

(Continued)

Table S1: Barriers and Facilitators to practicing in accordance with the TSANZ Guideline

| Questions (Domain)                                                                   | Strongly Disagree/ Disagree (%) | Neither agree nor disagree (%) | Strongly agree/ agree (%) | Number of responses to question | Strongly Disagree/ Disagree (%) | Neither agree nor disagree (%) | Strongly agree/ agree (%) | Number of responses to question | Strongly Disagree/ Disagree (%) | Neither agree nor disagree (%) | Strongly agree/ agree (%) | Number of responses to question | Strongly Disagree/ Disagree (%) | Neither agree nor disagree (%) | Strongly agree/ agree (%) | Number of responses to question | Strongly Disagree/ Disagree (%) | Neither agree nor disagree (%) | Strongly agree/ agree (%) | Number of responses to question |
|--------------------------------------------------------------------------------------|---------------------------------|--------------------------------|---------------------------|---------------------------------|---------------------------------|--------------------------------|---------------------------|---------------------------------|---------------------------------|--------------------------------|---------------------------|---------------------------------|---------------------------------|--------------------------------|---------------------------|---------------------------------|---------------------------------|--------------------------------|---------------------------|---------------------------------|
|                                                                                      | ALL CLINICIANS                  |                                |                           |                                 | PARAMEDIC                       |                                |                           |                                 | NURSE                           |                                |                           |                                 | DOCTOR                          |                                |                           |                                 | PHYSIOTHERAPIST                 |                                |                           |                                 |
| The TSANZ guideline leave enough room to consider patient wishes (Innovation)        | 13                              | 67                             | 19                        | 104                             | 0                               | 86                             | 14                        | 7                               | 19                              | 65                             | 17                        | 54                              | 9                               | 64                             | 27                        | 33                              | 10                              | 80                             | 10                        | 10                              |
| Managers/directors do not co-operate in applying the TSANZ guideline (Care provider) | 19                              | 59                             | 22                        | 100                             | 14                              | 57                             | 29                        | 7                               | 21                              | 58                             | 21                        | 52                              | 13                              | 63                             | 25                        | 32                              | 33                              | 56                             | 11                        | 9                               |
| The TSANZ guideline leave enough room for me to make my own decisions (Innovation)   | 16                              | 51                             | 32                        | 105                             | 0                               | 86                             | 14                        | 7                               | 22                              | 51                             | 27                        | 55                              | 12                              | 45                             | 42                        | 33                              | 10                              | 50                             | 40                        | 10                              |
| Organisational protocols do not allow me to apply the TSANZ guideline (Context)      | 29                              | 48                             | 23                        | 102                             | 14                              | 57                             | 29                        | 7                               | 28                              | 47                             | 25                        | 53                              | 25                              | 50                             | 25                        | 32                              | 60                              | 40                             | 0                         | 10                              |
| Patients do not comply in applying the TSANZ guideline (Patient)                     | 36                              | 48                             | 17                        | 101                             | 14                              | 57                             | 29                        | 7                               | 38                              | 46                             | 15                        | 52                              | 31                              | 47                             | 22                        | 32                              | 50                              | 50                             | 0                         | 10                              |
| Fellow clinicians do not apply the TSANZ guideline (Care provider)                   | 15                              | 45                             | 40                        | 102                             | 57                              | 0                              | 43                        | 7                               | 17                              | 41                             | 43                        | 54                              | 13                              | 45                             | 42                        | 31                              | 20                              | 60                             | 20                        | 10                              |

**Note:** The reported percentages are rounded to whole numbers; <sup>a</sup>The positive phrasing of this statement has been reversed for consistency in presentation

**Abbreviations:** EBC, Evidenced-based care; SOB, Short of breath; TSANZ, Thoracic Society of Australia & New Zealand
